# Supplementary material for: Current Status of Putative Animal Sources of SARS-CoV-2 Infection in Humans: Wildlife, Domestic Animals and Pets
Source: MDPI journal article supplement (doi:10.3390/microorganisms9040868), 2021-04-17
Supplement: s1 [file s1]

**Supplementary Table S1.** SARS-CoV-2 genomes from animal strains, according to GISAID (gisaid.org).

| Animal Host                    | Virus Name                                   | Accession ID    | Location                               |
|--------------------------------|----------------------------------------------|-----------------|----------------------------------------|
| <i>Canis lupus familiaris</i>  | hCoV-19/dog/Hong Kong/20-03695/2020          | EPI_ISL_450403  | Asia/Hong Kong                         |
|                                | hCoV-19/dog/USA/TX-TAMU-077/2020             | EPI_ISL_699508  | North America/USA/Texas/Brazos County  |
|                                | hCoV-19/dog/Netherlands/un-EMC-2/2020        | EPI_ISL_722380  | Europe/Netherlands                     |
|                                | hCoV-19/dog/Italy/Dog399-20BA/2020           | EPI_ISL_730652  | Europe/Italy/Apulia                    |
|                                | hCoV-19/dog/Brazil/RJ-FIOCRUZ-A004N/2020     | EPI_ISL_848072  | South America/Brazil/Rio de Janeiro    |
|                                | hCoV-19/dog/Brazil/RJ-FIOCRUZ-A118/2020      | EPI_ISL_848073  | South America/Brazil/Rio de Janeiro    |
|                                | hCoV-19/dog/Brazil/RJ-FIOCRUZ-A119/2020      | EPI_ISL_848074  | South America/Brazil/Rio de Janeiro    |
|                                | hCoV-19/dog/Brazil/RJ-FIOCRUZ-A136/2020      | EPI_ISL_848075  | South America/Brazil/Rio de Janeiro    |
|                                | hCoV-19/dog/Brazil/RJ-FIOCRUZ-A016NS3/2020   | EPI_ISL_848076  | South America/Brazil/Rio de Janeiro    |
|                                | hCoV-19/dog/Brazil/RJ-FIOCRUZ-A301/2020      | EPI_ISL_848077  | South America/Brazil/Rio de Janeiro    |
|                                | hCoV-19/dog/Brazil/RJ-FIOCRUZ-A398/2020      | EPI_ISL_848078  | South America/Brazil/Rio de Janeiro    |
|                                | hCoV-19/dog/Brazil/RJ-FIOCRUZ-A399/2020      | EPI_ISL_848079  | South America/Brazil/Rio de Janeiro    |
|                                | hCoV-19/dog/Brazil/RJ-FIOCRUZ-A401/2020      | EPI_ISL_848080  | South America/Brazil/Rio de Janeiro    |
|                                | hCoV-19/dog/Brazil/RJ-FIOCRUZ-A403/2020      | EPI_ISL_848081  | South America/Brazil/Rio de Janeiro    |
|                                | hCoV-19/dog/Brazil/RJ-FIOCRUZ-A404/2020      | EPI_ISL_848082  | South America/Brazil/Rio de Janeiro    |
| <i>Felis catus</i>             | hCoV-19/dog/Portugal/Dog42/2021              | EPI_ISL_1220542 | Europe/Portugal/Coimbra                |
|                                | hCoV-19/cat/USA/FL-BPHL-1083/2021            | EPI_ISL_1218884 | North America/USA/Florida              |
|                                | hCoV-19/cat/USA/FL-BPHL-1082/2021            | EPI_ISL_1218883 | North America/USA/Florida              |
|                                | hCoV-19/cat/USA/FL-BPHL-1081/2021            | EPI_ISL_1218882 | North America/USA/Florida              |
|                                | hCoV-19/cat/Switzerland/ZH-UZH-Cat1/2020     | EPI_ISL_1005699 | Europe/Switzerland/Zurich              |
|                                | hCoV-19/cat/Italy/VE-IZSVE-20DIA30040-2/2020 | EPI_ISL_962892  | Europe/Italy/Veneto/Venezia            |
|                                | hCoV-19/cat/France/un-ENV-TLHOOQ/2020        | EPI_ISL_873210  | Europe/France                          |
|                                | hCoV-19/cat/Russia/Len-RII-22390S/2021       | EPI_ISL_873040  | Europe/Russia/Leningrad/Vsevolozhsk    |
|                                | hCoV-19/cat/Brazil/RJ-FIOCRUZ-A408/2020      | EPI_ISL_848083  | South America/Brazil/Rio de Janeiro    |
|                                | hCoV-19/cat/Brazil/RJ-FIOCRUZ-A003N/2020     | EPI_ISL_848071  | South America/Brazil/Rio de Janeiro    |
|                                | hCoV-19/cat/Brazil/RJ-FIOCRUZ-A002N/2020     | EPI_ISL_848070  | South America/Brazil/Rio de Janeiro    |
|                                | hCoV-19/cat/Russia/RII-Len-22246S/2021       | EPI_ISL_811147  | Europe/Russia/Leningrad/Vsevolozhsk    |
|                                | hCoV-19/cat/Iran/MeshkinShahr/2020           | EPI_ISL_803107  | Asia/Iran                              |
|                                | hCoV-19/cat/Hong Kong/20-04236/2020          | EPI_ISL_759858  | Asia/Hong Kong                         |
|                                | hCoV-19/cat/Netherlands/UN-EMC-1/2020        | EPI_ISL_722300  | Europe/Netherlands                     |
|                                | hCoV-19/cat/Greece/2K/2020                   | EPI_ISL_717979  | Europe/Greece/Thessaloniki             |
|                                | hCoV-19/cat/USA/TX-TAMU-078/2020             | EPI_ISL_699509  | North America/USA/Texas/Brazos County  |
|                                | hCoV-19/cat/USA/TX-TAMU-057/2020             | EPI_ISL_699507  | North America/USA/Texas/Brazos County  |
|                                | hCoV-19/cat/USA/TX-TAMU-013/2020             | EPI_ISL_699506  | North America/USA/Texas/Brazos County  |
|                                | hCoV-19/cat/Denmark/mDK-317/2020             | EPI_ISL_683166  | Europe/Denmark                         |
|                                | hCoV-19/cat/Denmark/mDK-316/2020             | EPI_ISL_683165  | Europe/Denmark                         |
|                                | hCoV-19/cat/Denmark/mDK-315/2020             | EPI_ISL_683164  | Europe/Denmark                         |
|                                | hCoV-19/cat/England/CVR-Cat2/2020            | EPI_ISL_536400  | Europe/United Kingdom/England          |
|                                | hCoV-19/cat/Belgium/BE-MG-0320/2020          | EPI_ISL_487275  | Europe/Belgium                         |
|                                | hCoV-19/cat/France/Env-Di/2020               | EPI_ISL_483064  | Europe/France                          |
|                                | hCoV-19/cat/France/Env-Ba/2020               | EPI_ISL_483063  | Europe/France                          |
|                                | hCoV-19/cat/Spain/CT-IrsiCaixa-G5/2020       | EPI_ISL_482820  | Europe/Spain/Catalunya/Barcelona       |
|                                | hCoV-19/cat/USA/NYAD2/2020                   | EPI_ISL_450407  | North America/USA                      |
|                                | hCoV-19/cat/USA/NYAD1/2020                   | EPI_ISL_450406  | North America/USA                      |
|                                | hCoV-19/cat/France/IDF-53/2020               | EPI_ISL_437349  | Europe/France/Île-de-France/Essonne    |
|                                | hCoV-19/cat/China/Wuhan/2020                 | EPI_ISL_421531  | Asia/China/Wuhan                       |
| <i>Gorilla gorilla gorilla</i> | hCoV-19/gorilla/USA/CA-ALSR-5742/2021        | EPI_ISL_862722  | North America/USA/California/San Diego |
| <i>Chlorocebus sabaeus</i>     | hCoV-19/monkey/USA/MD-USAMRIID-AGM/2020      | EPI_ISL_825033  | North America/USA/Maryland             |
| <i>Manis javanica</i>          | hCoV-19/pangolin/Guangdong/SM79-9/2019       | EPI_ISL_471470  | Asia/China/Guangdong                   |
|                                | hCoV-19/pangolin/Guangdong/SM44-9/2019       | EPI_ISL_471469  | Asia/China/Guangdong                   |
|                                | hCoV-19/pangolin/Guangdong/FM45-9/2019       | EPI_ISL_471468  | Asia/China/Guangdong                   |
|                                | hCoV-19/pangolin/Guangdong/A22-2/2019        | EPI_ISL_471467  | Asia/China/Guangdong                   |
|                                | hCoV-19/pangolin/Guangdong/cDNA31-S/2019     | EPI_ISL_471466  | Asia/China/Guangdong                   |
|                                | hCoV-19/pangolin/Guangdong/cDNA20-S/2019     | EPI_ISL_471465  | Asia/China/Guangdong                   |
|                                | hCoV-19/pangolin/Guangdong/cDNA18-S/2019     | EPI_ISL_471464  | Asia/China/Guangdong                   |

|                                 |                                                                                                                                                  |                 |                                           |
|---------------------------------|--------------------------------------------------------------------------------------------------------------------------------------------------|-----------------|-------------------------------------------|
|                                 | hCoV-19/pangolin/Guangdong/cDNA16-S/2019                                                                                                         | EPI_ISL_471463  | Asia/China/Guangdong                      |
|                                 | hCoV-19/pangolin/Guangdong/cDNA9-S/2019                                                                                                          | EPI_ISL_471462  | Asia/China/Guangdong                      |
|                                 | hCoV-19/pangolin/Guangdong/cDNA8-S/2019                                                                                                          | EPI_ISL_471461  | Asia/China/Guangdong                      |
|                                 | hCoV-19/pangolin/China/MP789/2019                                                                                                                | EPI_ISL_412860  | Asia/China                                |
|                                 | hCoV-19/pangolin/Guangdong/1/2019                                                                                                                | EPI_ISL_410721  | Asia/China/Guangdong                      |
|                                 | hCoV-19/pangolin/Guangdong/P2S/2019                                                                                                              | EPI_ISL_410544  | Asia/China/Guangdong                      |
|                                 | hCoV-19/pangolin/Guangxi/P3B/2017                                                                                                                | EPI_ISL_410543  | Asia/China/Guangxi                        |
|                                 | hCoV-19/pangolin/Guangxi/P2V/2017                                                                                                                | EPI_ISL_410542  | Asia/China/Guangxi                        |
|                                 | hCoV-19/pangolin/Guangxi/P5E/2017                                                                                                                | EPI_ISL_410541  | Asia/China/Guangxi                        |
|                                 | hCoV-19/pangolin/Guangxi/P5L/2017                                                                                                                | EPI_ISL_410540  | Asia/China/Guangxi                        |
|                                 | hCoV-19/pangolin/Guangxi/P1E/2017                                                                                                                | EPI_ISL_410539  | Asia/China/Guangxi                        |
|                                 | hCoV-19/pangolin/Guangxi/P4L/2017                                                                                                                | EPI_ISL_410538  | Asia/China/Guangxi                        |
| <i>Manis pentadactyla</i>       | hCoV-19/pangolin/Yunnan/MP20/2017                                                                                                                | EPI_ISL_610156  | Asia/China/Yunnan                         |
| <i>Mus musculus</i>             | hCoV-19/mouse/Wuhan/LG/2020                                                                                                                      | EPI_ISL_1039212 | Asia/China/Wuhan (BALB/c mouse)           |
|                                 | hCoV-19/mouse/Harbin/HRB-26m/2020                                                                                                                | EPI_ISL_459910  | Asia/China/Heilongjiang/Harbin            |
| <i>Mustela lutreola</i>         | hCoV-19/mink/Netherlands/NB04_index/2020                                                                                                         | EPI_ISL_447634  | Europe/Netherlands                        |
|                                 | hCoV-19/mink/Netherlands/NB03_index/2020                                                                                                         | EPI_ISL_447633  | Europe/Netherlands                        |
|                                 | hCoV-19/mink/Netherlands/NB02_16RS/2020                                                                                                          | EPI_ISL_447632  | Europe/Netherlands                        |
|                                 | hCoV-19/mink/Netherlands/NB02_index/2020                                                                                                         | EPI_ISL_447631  | Europe/Netherlands                        |
|                                 | hCoV-19/mink/Netherlands/NB02_13KS/2020                                                                                                          | EPI_ISL_447630  | Europe/Netherlands                        |
|                                 | hCoV-19/mink/Netherlands/NB02_07KS/2020                                                                                                          | EPI_ISL_447629  | Europe/Netherlands                        |
|                                 | hCoV-19/mink/Netherlands/NB02_06KS/2020                                                                                                          | EPI_ISL_447628  | Europe/Netherlands                        |
|                                 | hCoV-19/mink/Netherlands/NB02_03KS/2020                                                                                                          | EPI_ISL_447627  | Europe/Netherlands                        |
|                                 | hCoV-19/mink/Netherlands/NB01_04KS/2020                                                                                                          | EPI_ISL_447626  | Europe/Netherlands                        |
|                                 | hCoV-19/mink/Netherlands/NB01_03KS/2020                                                                                                          | EPI_ISL_447625  | Europe/Netherlands                        |
|                                 | hCoV-19/mink/Netherlands/NB01_02KS/2020                                                                                                          | EPI_ISL_447624  | Europe/Netherlands                        |
|                                 | hCoV-19/mink/Netherlands/NB01_01KS/2020                                                                                                          | EPI_ISL_447623  | Europe/Netherlands                        |
|                                 | hCoV-19/mink/Netherlands/1/2020                                                                                                                  | EPI_ISL_431778  | Europe/Netherlands/Noord Brabant/Milheeze |
| <i>Neovison vison</i>           | 902 viruses, from North America (USA including Winsconsin and Michigan, and Canada) and Europe (the Netherlands, Denmark, Lithuania, and Poland) |                 |                                           |
| <i>Panthera leo</i>             | hCoV-19/lion/USA/NY-2/2020                                                                                                                       | EPI_ISL_566044  | North America/USA/New York                |
|                                 | hCoV-19/lion/USA/NY-041520/2020                                                                                                                  | EPI_ISL_566038  | North America/USA/New York                |
|                                 | hCoV-19/lion/USA/NY-3-041520/2020                                                                                                                | EPI_ISL_566037  | North America/USA/New York                |
|                                 | hCoV-19/lion/USA/NY-2-041520/2020                                                                                                                | EPI_ISL_566036  | North America/USA/New York                |
| <i>Panthera tigris jacksoni</i> | hCoV-19/tiger/USA/NY-P4/2020                                                                                                                     | EPI_ISL_566043  | North America/USA/New York                |
|                                 | hCoV-19/tiger/USA/NY-4-040420/2020                                                                                                               | EPI_ISL_566042  | North America/USA/New York                |
|                                 | hCoV-19/tiger/USA/NY-3-040420/2020                                                                                                               | EPI_ISL_566041  | North America/USA/New York                |
|                                 | hCoV-19/tiger/USA/NY-P3/2020                                                                                                                     | EPI_ISL_566040  | North America/USA/New York                |
|                                 | hCoV-19/tiger/USA/NY-2-040420/2020                                                                                                               | EPI_ISL_566039  | North America/USA/New York                |
|                                 | hCoV-19/tiger/USA/NY-040420/2020                                                                                                                 | EPI_ISL_420293  | North America/USA/New York                |
| <i>Rhinolophus affinis</i>      | hCoV-19/bat/Yunnan/RaTG13/2013                                                                                                                   | EPI_ISL_402131  | Asia/China/Yunnan/Puer City               |
| <i>Rhinolophus bat</i>          | hCoV-19/bat/Yunnan/PrC31/2018                                                                                                                    | EPI_ISL_1098866 | Asia/China/Yunnan/Puer City               |

**Supplementary Table S2.** Reports of pets diagnosed with COVID-19 using SARS-CoV-2 RT-PCR

| Date of Start    | Area                          | Pets per House     | Clinical Symptoms               | Sources                                                                                                                                                                                                                                                                                                                                                  |
|------------------|-------------------------------|--------------------|---------------------------------|----------------------------------------------------------------------------------------------------------------------------------------------------------------------------------------------------------------------------------------------------------------------------------------------------------------------------------------------------------|
| <b>ASIA</b>      |                               |                    |                                 |                                                                                                                                                                                                                                                                                                                                                          |
| <b>Hong Kong</b> |                               |                    |                                 |                                                                                                                                                                                                                                                                                                                                                          |
| 02/26/20         | Hong Kong                     | 1 dog              | Asymptomatic                    | Sit et al. Infection of dogs with SARS-CoV-2. Nature 2020; 586:776-8.<br><a href="https://www.oie.int/wahis_2/public/wahid.php/Reviewreport/Review?page_refer=MapFullEventReport&amp;reportid=33455&amp;newlang=fr">https://www.oie.int/wahis_2/public/wahid.php/Reviewreport/Review?page_refer=MapFullEventReport&amp;reportid=33455&amp;newlang=fr</a> |
| 03/18/20         | Hong Kong                     | 1 dog              | Asymptomatic                    | <a href="https://www.oie.int/wahis_2/public/wahid.php/Reviewreport/Review?page_refer=MapFullEventReport&amp;reportid=33684&amp;newlang=en">https://www.oie.int/wahis_2/public/wahid.php/Reviewreport/Review?page_refer=MapFullEventReport&amp;reportid=33684&amp;newlang=en</a>                                                                          |
| 03/30/20         | Hong Kong                     | 1 cat              | Asymptomatic                    | <a href="https://www.oie.int/wahis_2/public/wahid.php/Reviewreport/Review?page_refer=MapFullEventReport&amp;reportid=33832&amp;newlang=en">https://www.oie.int/wahis_2/public/wahid.php/Reviewreport/Review?page_refer=MapFullEventReport&amp;reportid=33832&amp;newlang=en</a>                                                                          |
| 07/13/20         | Hong Kong                     | 1 cat              | Asymptomatic                    | <a href="https://www.oie.int/wahis_2/public/wahid.php/Reviewreport/Review?reportid=35452">https://www.oie.int/wahis_2/public/wahid.php/Reviewreport/Review?reportid=35452</a>                                                                                                                                                                            |
| 07/21/20         | Hong Kong                     | 1 cat              | Asymptomatic                    | <a href="https://www.oie.int/wahis_2/public/wahid.php/Reviewreport/Review?page_refer=MapFullEventReport&amp;reportid=35169">https://www.oie.int/wahis_2/public/wahid.php/Reviewreport/Review?page_refer=MapFullEventReport&amp;reportid=35169</a>                                                                                                        |
| 07/28/20         | Hong Kong                     | 1 cat              | Asymptomatic                    | <a href="https://www.oie.int/wahis_2/public/wahid.php/Reviewreport/Review?reportid=35351">https://www.oie.int/wahis_2/public/wahid.php/Reviewreport/Review?reportid=35351</a>                                                                                                                                                                            |
| 07/31/20         | Hong Kong                     | 1 dog              | Asymptomatic                    |                                                                                                                                                                                                                                                                                                                                                          |
| 07/31/20         | Hong Kong                     | 1 cat              | Asymptomatic                    |                                                                                                                                                                                                                                                                                                                                                          |
| 08/04/20         | Hong Kong                     | 1 cat              | Asymptomatic                    |                                                                                                                                                                                                                                                                                                                                                          |
| 08/06/20         | Hong Kong                     | 1 dog              | Asymptomatic                    | <a href="https://www.oie.int/wahis_2/public/wahid.php/Reviewreport/Review?page_refer=MapFullEventReport&amp;reportid=36751">https://www.oie.int/wahis_2/public/wahid.php/Reviewreport/Review?page_refer=MapFullEventReport&amp;reportid=36751</a>                                                                                                        |
| 11/23/20         | Hong Kong                     | 1 dog              | Asymptomatic                    |                                                                                                                                                                                                                                                                                                                                                          |
| 11/23/20         | Hong Kong                     | 1 dog              | Asymptomatic                    |                                                                                                                                                                                                                                                                                                                                                          |
| 11/25/20         | Hong Kong                     | 1 cat              | Asymptomatic                    |                                                                                                                                                                                                                                                                                                                                                          |
| 12/12/20         | Hong Kong                     | 1 dog              | Asymptomatic                    | <a href="https://www.oie.int/wahis_2/public/wahid.php/Reviewreport/Review?page_refer=MapFullEventReport&amp;reportid=37150">https://www.oie.int/wahis_2/public/wahid.php/Reviewreport/Review?page_refer=MapFullEventReport&amp;reportid=37150</a>                                                                                                        |
| 12/14/20         | Hong Kong                     | 1 dog              | Asymptomatic                    |                                                                                                                                                                                                                                                                                                                                                          |
| 12/15/20         | Hong Kong                     | 1 dog              | Asymptomatic                    |                                                                                                                                                                                                                                                                                                                                                          |
| 12/30/2020       | Hong Kong                     | 1 cat              | Asymptomatic                    | <a href="https://www.oie.int/wahis_2/public/wahid.php/Reviewreport/Review?reportid=37454">https://www.oie.int/wahis_2/public/wahid.php/Reviewreport/Review?reportid=37454</a>                                                                                                                                                                            |
| <b>Japan</b>     |                               |                    |                                 |                                                                                                                                                                                                                                                                                                                                                          |
| 07/26/20         | Tokyo                         | 1 dog              | Asymptomatic                    | <a href="https://www.oie.int/wahis_2/public/wahid.php/Reviewreport/Review?page_refer=MapFullEventReport&amp;reportid=35864">https://www.oie.int/wahis_2/public/wahid.php/Reviewreport/Review?page_refer=MapFullEventReport&amp;reportid=35864</a>                                                                                                        |
| 07/31/20         | Tokyo                         | 1 dog              | Asymptomatic                    |                                                                                                                                                                                                                                                                                                                                                          |
| 08/07/20         | Tokyo                         | 1 dog              | Asymptomatic                    |                                                                                                                                                                                                                                                                                                                                                          |
| 08/12/20         | Tokyo                         | 1 dog              | Asymptomatic                    |                                                                                                                                                                                                                                                                                                                                                          |
| 09/12/20         | Tokyo                         | 2 cats             | Asymptomatic                    | <a href="https://www.oie.int/wahis_2/public/wahid.php/Reviewreport/Review?reportid=36420">https://www.oie.int/wahis_2/public/wahid.php/Reviewreport/Review?reportid=36420</a>                                                                                                                                                                            |
| <b>EUROPE</b>    |                               |                    |                                 |                                                                                                                                                                                                                                                                                                                                                          |
| 03/18/20         | Belgium                       | 1 cat              | Digestive and respiratory signs | Garigliany M, et al. SARS-CoV-2 Natural Transmission from Human to Cat, Belgium, March 2020. Emerg Infect Dis 2020; 26:3069-71                                                                                                                                                                                                                           |
| 04/22/20         | Spain (Catalonia)             | 1 cat              | Respiratory signs               | <a href="https://www.plateforme-esa.fr/article/covid-19-et-animaux-mise-a-jour-au-05-01-2021">https://www.plateforme-esa.fr/article/covid-19-et-animaux-mise-a-jour-au-05-01-2021</a>                                                                                                                                                                    |
| 05/02/20         | France (Paris)                | 1 cat              | Digestive and respiratory signs | Sailleau C, et al. First detection and genome sequencing of SARS-CoV-2 in an infected cat in France. Transbound Emerg Dis 2020; 67:2324-8.                                                                                                                                                                                                               |
| 05/11/20         | Italy                         | 1 dog              | Asymptomatic                    | <a href="https://promedmail.org/promed-post/?id=7934864">https://promedmail.org/promed-post/?id=7934864</a>                                                                                                                                                                                                                                              |
| 05/12/20         | France (Bordeaux)             | 1 cat              | Digestive and respiratory signs | <a href="http://www.envt.fr/content/communiqu%C3%A">http://www.envt.fr/content/communiqu%C3%A</a>                                                                                                                                                                                                                                                        |
| 05/13/20         | Germany (Palatinate, Bavaria) | 1 cat              | Asymptomatic                    | <a href="https://promedmail.org/promed-post/?id=7332909">https://promedmail.org/promed-post/?id=7332909</a>                                                                                                                                                                                                                                              |
| 05/18/20         | Russia (Moscow area)          | 1 cat <sup>1</sup> | Asymptomatic                    | <a href="https://www.oie.int/wahis_2/public/wahid.php/Reviewreport/Review?page_refer=MapFullEventReport&amp;reportid=34443">https://www.oie.int/wahis_2/public/wahid.php/Reviewreport/Review?page_refer=MapFullEventReport&amp;reportid=34443</a>                                                                                                        |
| 06/13/20         | Denmark                       | 1 dog <sup>2</sup> | Asymptomatic                    | <a href="https://promedmail.org/promed-post/?id=20200624.7506728">https://promedmail.org/promed-post/?id=20200624.7506728</a>                                                                                                                                                                                                                            |

|                                 |                                   |                    |                                 |                                                                                                                                                                                                                                                                                                                                                                                      |
|---------------------------------|-----------------------------------|--------------------|---------------------------------|--------------------------------------------------------------------------------------------------------------------------------------------------------------------------------------------------------------------------------------------------------------------------------------------------------------------------------------------------------------------------------------|
| (North Jutland)                 |                                   |                    |                                 |                                                                                                                                                                                                                                                                                                                                                                                      |
| 07/27/20                        | United Kingdom<br>(South England) | 1 cat              | Respiratory signs               | <a href="https://promedmail.org/promed-post/?id=7617582">https://promedmail.org/promed-post/?id=7617582</a><br><a href="https://www.oie.int/wahis_2/public/wahid.php/Reviewreport/Review?page_refer=MapFullEventReport&amp;reportid=35182">https://www.oie.int/wahis_2/public/wahid.php/Reviewreport/Review?page_refer=MapFullEventReport&amp;reportid=35182</a>                     |
| 12/01/20                        | Slovenia                          | 1 ferret           | Digestive signs                 | <a href="https://www.oie.int/wahis_2/public/wahid.php/Reviewreport/Review?page_refer=MapFullEventReport&amp;reportid=37289">https://www.oie.int/wahis_2/public/wahid.php/Reviewreport/Review?page_refer=MapFullEventReport&amp;reportid=37289</a>                                                                                                                                    |
| 12/03/20                        | Switzerland<br>(Zurich)           | 1 cat              | Respiratory signs               | <a href="https://www.oie.int/fileadmin/Home/MM/Switzerland_03.12.2020_Research_on_SARS-CoV-2_-_confirmation_in_a_cat_in_the_Canton_of_Zurich.pdf">https://www.oie.int/fileadmin/Home/MM/Switzerland_03.12.2020_Research_on_SARS-CoV-2_-_confirmation_in_a_cat_in_the_Canton_of_Zurich.pdf</a>                                                                                        |
| <b>NORTH AMERICA</b>            |                                   |                    |                                 |                                                                                                                                                                                                                                                                                                                                                                                      |
| <b>United States of America</b> |                                   |                    |                                 |                                                                                                                                                                                                                                                                                                                                                                                      |
| 04/01/20                        | New-York                          | 1 cat              | Sneezing and eyes discharge     | <a href="https://www.oie.int/wahis_2/public/wahid.php/Reviewreport/Review?reportid=34086">https://www.oie.int/wahis_2/public/wahid.php/Reviewreport/Review?reportid=34086</a>                                                                                                                                                                                                        |
| 04/06/20                        | New-York                          | 1 cat <sup>3</sup> | Sneezing and eyes discharge     | <a href="https://www.cdc.gov/media/releases/2020/s0422-covid-19-cats-NYC.html">https://www.cdc.gov/media/releases/2020/s0422-covid-19-cats-NYC.html</a>                                                                                                                                                                                                                              |
| 04/15/20                        | New-York                          | 1 dog              | Respiratory signs               | <a href="https://www.oie.int/wahis_2/public/wahid.php/Reviewreport/Review?reportid=34525">https://www.oie.int/wahis_2/public/wahid.php/Reviewreport/Review?reportid=34525</a>                                                                                                                                                                                                        |
| 05/19/20                        | Illinois<br>(Cook)                | 1 cat <sup>1</sup> | Respiratory signs               | <a href="https://www.oie.int/wahis_2/public/wahid.php/Reviewreport/Review?reportid=34590">https://www.oie.int/wahis_2/public/wahid.php/Reviewreport/Review?reportid=34590</a><br><a href="https://www.aphis.usda.gov/aphis/ourfocus/animalhealth/sa_one_health/sars-cov-2-animals-us">https://www.aphis.usda.gov/aphis/ourfocus/animalhealth/sa_one_health/sars-cov-2-animals-us</a> |
| 05/20/20                        | Minnesota<br>(Carver)             | 1 cat              | Respiratory signs               | <a href="https://www.oie.int/wahis_2/public/wahid.php/Reviewreport/Review?page_refer=MapFullEventReport&amp;reportid=34548">https://www.oie.int/wahis_2/public/wahid.php/Reviewreport/Review?page_refer=MapFullEventReport&amp;reportid=34548</a>                                                                                                                                    |
| 06/22/20                        | Georgia<br>(Berrien)              | 1 dog              | Neurological signs <sup>4</sup> | <a href="https://www.oie.int/wahis_2/public/wahid.php/Reviewreport/Review?reportid=34937">https://www.oie.int/wahis_2/public/wahid.php/Reviewreport/Review?reportid=34937</a>                                                                                                                                                                                                        |
| 06/25/20                        | California<br>(Orange)            | 1 cat              | Asymptomatic                    | <a href="https://www.oie.int/wahis_2/public/wahid.php/Reviewreport/Review?reportid=34991">https://www.oie.int/wahis_2/public/wahid.php/Reviewreport/Review?reportid=34991</a><br><a href="https://www.aphis.usda.gov/aphis/ourfocus/animalhealth/sa_one_health/sars-cov-2-animals-us">https://www.aphis.usda.gov/aphis/ourfocus/animalhealth/sa_one_health/sars-cov-2-animals-us</a> |
| 06/26/20                        | Texas<br>(Tarrant)                | 1 dog              | Asymptomatic                    | <a href="https://www.oie.int/wahis_2/public/wahid.php/Reviewreport/Review?reportid=34991">https://www.oie.int/wahis_2/public/wahid.php/Reviewreport/Review?reportid=34991</a><br><a href="https://promedmail.org/promed-post/?id=7554832">https://promedmail.org/promed-post/?id=7554832</a>                                                                                         |
| 06/26/20                        | South Carolina<br>(Charleston)    | 1 dog              | Asymptomatic                    | <a href="https://www.oie.int/wahis_2/public/wahid.php/Reviewreport/Review?reportid=35051">https://www.oie.int/wahis_2/public/wahid.php/Reviewreport/Review?reportid=35051</a><br><a href="https://promedmail.org/promed-post/?id=7588843">https://promedmail.org/promed-post/?id=7588843</a>                                                                                         |
| 06/28/20                        | Texas<br>(Brazos)                 | 1 cat              | Asymptomatic                    | <a href="https://www.oie.int/wahis_2/public/wahid.php/Reviewreport/Review?page_refer=MapFullEventReport&amp;reportid=35140">https://www.oie.int/wahis_2/public/wahid.php/Reviewreport/Review?page_refer=MapFullEventReport&amp;reportid=35140</a>                                                                                                                                    |
| 07/10/20                        | Arizona<br>(Maricopa)             | 1 dog              | Respiratory signs               | <a href="https://www.oie.int/wahis_2/public/wahid.php/Reviewreport/Review?page_refer=MapFullEventReport&amp;reportid=35140">https://www.oie.int/wahis_2/public/wahid.php/Reviewreport/Review?page_refer=MapFullEventReport&amp;reportid=35140</a>                                                                                                                                    |
| 07/14/20                        | Georgia<br>(Coweta)               | 1 cat              | Respiratory signs               | <a href="https://www.oie.int/wahis_2/public/wahid.php/Reviewreport/Review?reportid=35525">https://www.oie.int/wahis_2/public/wahid.php/Reviewreport/Review?reportid=35525</a>                                                                                                                                                                                                        |
| 07/17/20                        | Texas<br>(Brazos)                 | 1 cat              | Asymptomatic                    | <a href="https://www.oie.int/wahis_2/public/wahid.php/Reviewreport/Review?reportid=35236">https://www.oie.int/wahis_2/public/wahid.php/Reviewreport/Review?reportid=35236</a>                                                                                                                                                                                                        |
| 07/22/20                        | Louisiana<br>(Livingston)         | 1 dog              | Asymptomatic                    | <a href="https://www.oie.int/wahis_2/public/wahid.php/Reviewreport/Review?reportid=35306">https://www.oie.int/wahis_2/public/wahid.php/Reviewreport/Review?reportid=35306</a>                                                                                                                                                                                                        |
| 07/28/20                        | Texas (Brazos)                    | 1 dog              | Asymptomatic                    | <a href="https://www.oie.int/wahis_2/public/wahid.php/Reviewreport/Review?reportid=35408">https://www.oie.int/wahis_2/public/wahid.php/Reviewreport/Review?reportid=35408</a>                                                                                                                                                                                                        |
| 07/29/20                        | Texas (Brazos)                    | 1 cat              | Asymptomatic                    | <a href="https://www.oie.int/wahis_2/public/wahid.php/Reviewreport/Review?reportid=35408">https://www.oie.int/wahis_2/public/wahid.php/Reviewreport/Review?reportid=35408</a>                                                                                                                                                                                                        |
| 08/04/20                        | North Carolina<br>(Moore)         | 1 dog              | Respiratory signs               | <a href="https://www.oie.int/wahis_2/public/wahid.php/Reviewreport/Review?reportid=35408">https://www.oie.int/wahis_2/public/wahid.php/Reviewreport/Review?reportid=35408</a>                                                                                                                                                                                                        |
| 08/10/20                        | Maryland<br>(Hartford)            | 1 cat              | Respiratory signs               | <a href="https://www.oie.int/wahis_2/public/wahid.php/Reviewreport/Review?reportid=35525">https://www.oie.int/wahis_2/public/wahid.php/Reviewreport/Review?reportid=35525</a>                                                                                                                                                                                                        |
| 08/11/20                        | Texas (Brazos)                    | 1 dog              | Nasal discharge                 | <a href="https://www.oie.int/wahis_2/public/wahid.php/Reviewreport/Review?reportid=35691">https://www.oie.int/wahis_2/public/wahid.php/Reviewreport/Review?reportid=35691</a>                                                                                                                                                                                                        |
| 08/12/20                        | Texas (Brazos)                    | 1 cat              | Asymptomatic                    |                                                                                                                                                                                                                                                                                                                                                                                      |
| 08/12/20                        | Texas<br>(Somervell)              | 1 cat              | Asymptomatic                    | <a href="https://www.oie.int/wahis_2/public/wahid.php/Reviewreport/Review?reportid=35525">https://www.oie.int/wahis_2/public/wahid.php/Reviewreport/Review?reportid=35525</a>                                                                                                                                                                                                        |
| 08/13/20                        | California<br>(Contra Costa)      | 1 cat              | Respiratory signs               |                                                                                                                                                                                                                                                                                                                                                                                      |
| 08/17/20                        | Louisiana<br>(Rapides)            | 1 cat              | Respiratory signs               | <a href="https://www.oie.int/wahis_2/public/wahid.php/Reviewreport/Review?reportid=35605">https://www.oie.int/wahis_2/public/wahid.php/Reviewreport/Review?reportid=35605</a>                                                                                                                                                                                                        |
| 08/21/20                        | Texas (Brazos)                    | 1 cat              | Asymptomatic                    | <a href="https://www.oie.int/wahis_2/public/wahid.php/Reviewreport/Review?reportid=35691">https://www.oie.int/wahis_2/public/wahid.php/Reviewreport/Review?reportid=35691</a>                                                                                                                                                                                                        |
| 08/21/20                        | Texas (Brazos)                    | 1 dog              | Asymptomatic                    |                                                                                                                                                                                                                                                                                                                                                                                      |
| 09/06/20                        | Kentucky<br>(Fayette)             | 1 cat              | Respiratory signs               | <a href="https://www.oie.int/wahis_2/public/wahid.php/Reviewreport/Review?page_refer=MapFullEventReport&amp;reportid=35857">https://www.oie.int/wahis_2/public/wahid.php/Reviewreport/Review?page_refer=MapFullEventReport&amp;reportid=35857</a>                                                                                                                                    |

|                      |                                     |        |                                       |                                                                                                                                                                                                                                                   |
|----------------------|-------------------------------------|--------|---------------------------------------|---------------------------------------------------------------------------------------------------------------------------------------------------------------------------------------------------------------------------------------------------|
| 09/11/20             | Texas (Brazos)                      | 1 cat  | Asymptomatic                          | <a href="https://www.oie.int/wahis_2/public/wahid.php/Reviewreport/Review?page_refer=MapFullEventReport&amp;reportid=35946">https://www.oie.int/wahis_2/public/wahid.php/Reviewreport/Review?page_refer=MapFullEventReport&amp;reportid=35946</a> |
| 09/14/20             | Texas (Brazos)                      | 1 dog  | Respiratory signs                     | <a href="https://www.oie.int/wahis_2/public/wahid.php/Reviewreport/Review?page_refer=MapFullEventReport&amp;reportid=35946">https://www.oie.int/wahis_2/public/wahid.php/Reviewreport/Review?page_refer=MapFullEventReport&amp;reportid=35946</a> |
| 09/25/20             | Alabama (Lee)                       | 2 cats | Respiratory signs                     | <a href="https://www.oie.int/wahis_2/public/wahid.php/Reviewreport/Review?page_refer=MapFullEventReport&amp;reportid=35973">https://www.oie.int/wahis_2/public/wahid.php/Reviewreport/Review?page_refer=MapFullEventReport&amp;reportid=35973</a> |
| 10/01/20             | Texas (Brazos)                      | 1 dog  | Digestive signs                       | <a href="https://www.oie.int/wahis_2/public/wahid.php/Reviewreport/Review?page_refer=MapFullEventReport&amp;reportid=36309">https://www.oie.int/wahis_2/public/wahid.php/Reviewreport/Review?page_refer=MapFullEventReport&amp;reportid=36309</a> |
| 10/02/20             | Pennsylvania (Cumberland)           | 1 cat  | Respiratory signs                     | <a href="https://www.oie.int/wahis_2/public/wahid.php/Reviewreport/Review?reportid=36309">https://www.oie.int/wahis_2/public/wahid.php/Reviewreport/Review?reportid=36309</a>                                                                     |
| 10/22/20             | Texas (Brazos)                      | 2 cats | 1 respiratory signs<br>1 asymptomatic |                                                                                                                                                                                                                                                   |
| 11/08/20             | Florida (Okaloosa)                  | 1 dog  | Respiratory signs                     |                                                                                                                                                                                                                                                   |
| 11/13/20             | Pennsylvania (Washington)           | 1 dog  | Respiratory signs                     | <a href="https://www.oie.int/wahis_2/public/wahid.php/Reviewreport/Review?page_refer=MapFullEventReport&amp;reportid=37147">https://www.oie.int/wahis_2/public/wahid.php/Reviewreport/Review?page_refer=MapFullEventReport&amp;reportid=37147</a> |
| 11/15/20             | Texas (Brazos)                      | 1 cat  | Asymptomatic                          |                                                                                                                                                                                                                                                   |
| 11/17/20             | Wisconsin (Eau Claire)              | 1 cat  | Respiratory signs                     |                                                                                                                                                                                                                                                   |
| 11/20/20             | Texas (Tarrant)                     | 1 cat  | Vomiting and sneezing                 |                                                                                                                                                                                                                                                   |
| 12/03/20             | Kansas (Riley)                      | 1 dog  | Nasal discharge                       |                                                                                                                                                                                                                                                   |
| 12/07/20             | Virginia (Rockingham)               | 1 cat  | Respiratory signs                     | <a href="https://www.oie.int/wahis_2/public/wahid.php/Reviewreport/Review?reportid=37493">https://www.oie.int/wahis_2/public/wahid.php/Reviewreport/Review?reportid=37493</a>                                                                     |
| 12/14/20             | Pennsylvania (Montgomery)           | 1 dog  | Digestive signs                       | <a href="https://www.oie.int/wahis_2/public/wahid.php/Reviewreport/Review?reportid=37355">https://www.oie.int/wahis_2/public/wahid.php/Reviewreport/Review?reportid=37355</a>                                                                     |
| 12/16/20             | Florida (Polk)                      | 1 cat  | Respiratory signs                     | <a href="https://www.oie.int/wahis_2/public/wahid.php/Reviewreport/Review?reportid=37493">https://www.oie.int/wahis_2/public/wahid.php/Reviewreport/Review?reportid=37493</a>                                                                     |
| 12/28/20             | California (San Bernardino)         | 1 cat  | Not available                         | <a href="https://www.oie.int/wahis_2/public/wahid.php/Reviewreport/Review?reportid=37602">https://www.oie.int/wahis_2/public/wahid.php/Reviewreport/Review?reportid=37602</a>                                                                     |
| 01/01/21             | Kansas (Pottawatomie)               | 1 cat  | Digestive signs                       |                                                                                                                                                                                                                                                   |
| 01/07/21             | Arkansas (Saline)                   | 1 cat  | Nasal discharge                       | <a href="https://www.oie.int/wahis_2/public/wahid.php/Reviewreport/Review?reportid=37755">https://www.oie.int/wahis_2/public/wahid.php/Reviewreport/Review?reportid=37755</a>                                                                     |
| 01/09/21             | Tennessee (Knox)                    | 1 cat  | Respiratory signs                     |                                                                                                                                                                                                                                                   |
| <b>Mexico</b>        |                                     |        |                                       |                                                                                                                                                                                                                                                   |
| 08/14/20             | Cuauhtémoc                          | 1 dog  | Respiratory signs                     |                                                                                                                                                                                                                                                   |
| 08/14/20             | Iztacalco                           | 1 dog  | Respiratory signs                     | <a href="https://www.oie.int/wahis_2/public/wahid.php/Reviewreport/Review?page_refer=MapFullEventReport&amp;reportid=37117">https://www.oie.int/wahis_2/public/wahid.php/Reviewreport/Review?page_refer=MapFullEventReport&amp;reportid=37117</a> |
| 11/13/20             | Cuautitlán                          | 1 dog  | Respiratory signs                     |                                                                                                                                                                                                                                                   |
| 11/23/20             | Mztapalapa                          | 2 dogs | Respiratory signs                     |                                                                                                                                                                                                                                                   |
| <b>SOUTH AMERICA</b> |                                     |        |                                       |                                                                                                                                                                                                                                                   |
| 05/01/20             | <b>Chili</b> (Santiago)             | 3 cats | Not available                         | <a href="https://www.oie.int/wahis_2/public/wahid.php/Reviewreport/Review?page_refer=MapFullEventReport&amp;reportid=36236">https://www.oie.int/wahis_2/public/wahid.php/Reviewreport/Review?page_refer=MapFullEventReport&amp;reportid=36236</a> |
| 10/05/20             | <b>Brazil</b> (Cuiabá, Mato Grosso) | 1 cat  | Asymptomatic                          | <a href="https://www.oie.int/wahis_2/public/wahid.php/Reviewreport/Review?page_refer=MapFullEventReport&amp;reportid=36324">https://www.oie.int/wahis_2/public/wahid.php/Reviewreport/Review?page_refer=MapFullEventReport&amp;reportid=36324</a> |
| <b>Argentina</b>     |                                     |        |                                       |                                                                                                                                                                                                                                                   |
| 09/01/20             | La Plata, Buenos Aires              | 1 cat  | Nasal discharge                       |                                                                                                                                                                                                                                                   |
| 10/09/20             | Del Estero                          | 4 dogs | <sup>5</sup>                          | <a href="https://www.oie.int/wahis_2/public/wahid.php/Reviewreport/Review?page_refer=MapFullEventReport&amp;reportid=36560">https://www.oie.int/wahis_2/public/wahid.php/Reviewreport/Review?page_refer=MapFullEventReport&amp;reportid=36560</a> |
|                      |                                     | 1 cat  | weakening and anorexia                |                                                                                                                                                                                                                                                   |

<sup>1</sup> No information available on the mode of transmission; <sup>2</sup> Case linked to an outbreak on a mink farm; <sup>3</sup> Case in a neighborhood affected and cat authorized to leave; <sup>4</sup> At necropsy, a pituitary tumor was identified, which is thought to be the cause of the dog's neurological signs; <sup>5</sup> One of the dogs exhibits symptoms (conjunctivitis, cough, dyspnea, and weakening). The other three dogs were asymptomatic.
